# Supplementary material for: Overcoming Challenges to Treating Tobacco use During Pregnancy - A Qualitative study of Australian General Practitioners Barriers
Source: BMC Pregnancy Childbirth. 2019 Feb 7;19:61. doi: 10.1186/s12884-019-2208-8 (PMC6367814; doi:10.1186/s12884-019-2208-8)
Supplement: Supplementary file 1 — Interview Guide. A description of the topics and questions covered as part of the interview with the participants. (PDF 95 kb) [file 12884_2019_2208_MOESM1_ESM.pdf]

## **Additional file 1: Interview Guide**

**Topics that should be covered (and an example of a question that can be used if not already covered)**

### **a. Usual approach**

- i. What would you say is your usual approach to a pregnant woman who smokes?
- ii. In your experience, what have been the outcomes from your management of smoking in pregnant women?

### **b. Enablers and Facilitators - General**

- iii. How do you feel about improving your management of smoking in pregnant women?
- iv. In your opinion, what could help you improve your management of smoking in pregnant women?
- v. What would help you remember to discuss this with pregnant women?

### **c. Knowledge**

- vi. What are your thoughts on your knowledge to address smoking properly in pregnant women?
- vii. What would be the preferred way for you to improve your knowledge on this topic? What would be the most effective way for you?

### **d. Time**

- viii. What has been your experience concerning the time frame available to address smoking properly in pregnant women?
- ix. How much time in your experience is needed for this issue? What do you think could help you incorporate this into your timeframe?

### **e. Optimism**

- x. Do you feel optimistic/pessimistic about your management of smoking in pregnant women? Could you describe why that is? What would help you feel more optimistic?

### **f. Confidence**

- xi. How would you describe your confidence on management of smoking in pregnant women? What would help you feel more confident?

### **g. NRT**

- xii. What has been your experience with prescribing Nicotine Replacement Therapy (NRT) in pregnant women who smoke? What do you think would help you subscribe NRT to pregnant women who smoke?

**h. Referral**

- xiii. Could you tell me a little about your experience with referring women to cessation support (such as the quit-line or a local smoking cessation group)?
- xiv. What would help you to routinely refer pregnant women to cessation support?

**i. Follow up**

- xv. What has been your experience with following up on women in regard to their smoking?
- xvi. What would facilitate you to follow up?

**j. Discussing the psychosocial context**

- xvii. How do you feel about discussing with pregnant women the psychosocial context of smoking?
- xviii. What can help you with this?

**k. Subgroups**

- xix. Describe your experience with any subgroups of pregnant women for whom there may be additional challenges to treatment?
